# Supplementary material for: Redox modifications of cysteine-containing proteins, cell cycle arrest and translation inhibition: Involvement in vitamin C-induced breast cancer cell death
Source: PubMed Central journal article supplement — Redox Biol. 2019 Aug 2;26:101290. doi: 10.1016/j.redox.2019.101290 (PMC6831881; doi:10.1016/j.redox.2019.101290), 2019-08-02
Supplement: mmc2.pdf [file mmc2.pdf]

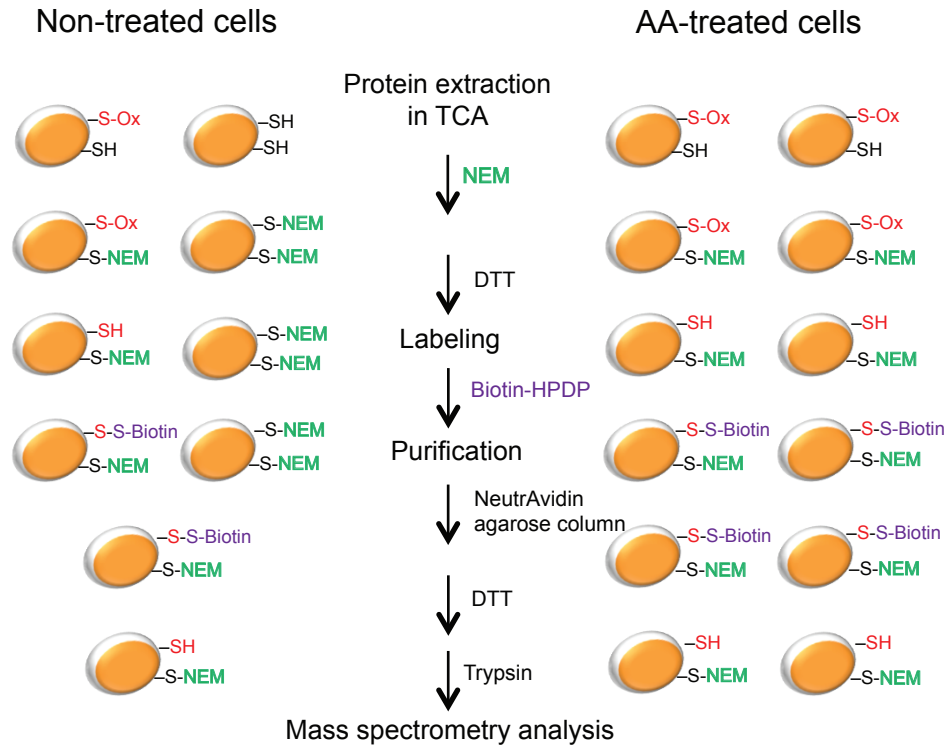

Supplementary Fig.1. Mass spectrometry “redoxome” method to identify the differentially oxidized cysteine-containing proteins upon AA treatment. Details of the protocol and analysis are described in Supplementary Materials and Methods. In short, total proteins from non-treated and 10 mM AA-treated MDA-MB-231 cells for ½ hour were extracted in TCA and resuspended in NEM to protect cysteine-free thiols. Proteins were resuspended in DTT to reduce the oxidized thiols of cysteine-containing proteins. Extracts were resuspended in EZ-Link Biotin-HPDP to allow labeling of newly reduced thiols. For purification of the biotin-tagged proteins, extracts were incubated with NeutrAvidin Agarose Resins and then the biotinylated fraction is eluted with DTT. Oxidized cysteine-containing proteins prepared from cells were digested and analyzed in triplicate with an Orbitrap Fusion Tribrid. Redoxomes from non-treated and AA-treated cells were compared. Proteins with significant variations of protein oxidation (fold change over 1.5 in at least one of the two biological experiments) and associated Anova P value lower than 0.05 between the two conditions were identified.

**A****Top Canonical Pathways**

| Name                                                 | <i>P</i> value | Overlap      |
|------------------------------------------------------|----------------|--------------|
| NRF2-mediated Oxidative Stress Response              | 2.19E-05       | 5.0 % 10/199 |
| Aryl Hydrocarbon Receptor Signaling                  | 6.29E-05       | 5.7 % 8/141  |
| Hepatic Fibrosis / Hepatic Stellate Cell Activation  | 7.91E-05       | 4.8 % 9/187  |
| Regulation of Cellular Mechanics by Calpain Protease | 3.34E-04       | 7.9 % 5/63   |
| Huntington's Disease Signaling                       | 6.79E-04       | 3.6% 9/250   |

**Molecular and Cellular Functions**

| Name                               | <i>P</i> value      | # Molecules |
|------------------------------------|---------------------|-------------|
| Cellular Movement                  | 1.74E-04 – 1.77E-15 | 85          |
| Cellular Death and Survival        | 1.63E-04 – 5.48E-14 | 98          |
| Cellular Assembly and Organization | 1.52E-04 – 9.37E-10 | 59          |
| Cellular Function and Maintenance  | 1.53E-04 – 9.37E-10 | 84          |
| Cellular Development               | 1.78E-04 – 2.37E-08 | 91          |

**Top Networks**

| ID Associated Network Functions                                                                  | Score |
|--------------------------------------------------------------------------------------------------|-------|
| 1. Cancer, Cell Death and Survival, Cellular Development                                         | 41    |
| 2. Carbohydrate Metabolism, Small Molecule Biochemistry, Nervous System Development and Function | 37    |
| 3. Carbohydrate Metabolism, Small Molecule Biochemistry, Hereditary Disorder                     | 34    |
| 4. Cell-to-Cell Signaling and Interaction, Cancer, Organismal Injury and Abnormalities           | 25    |
| 5. Cell Death and Survival, Organ Morphology, Tissue Development                                 | 23    |

**B****Top GO Biological Processes**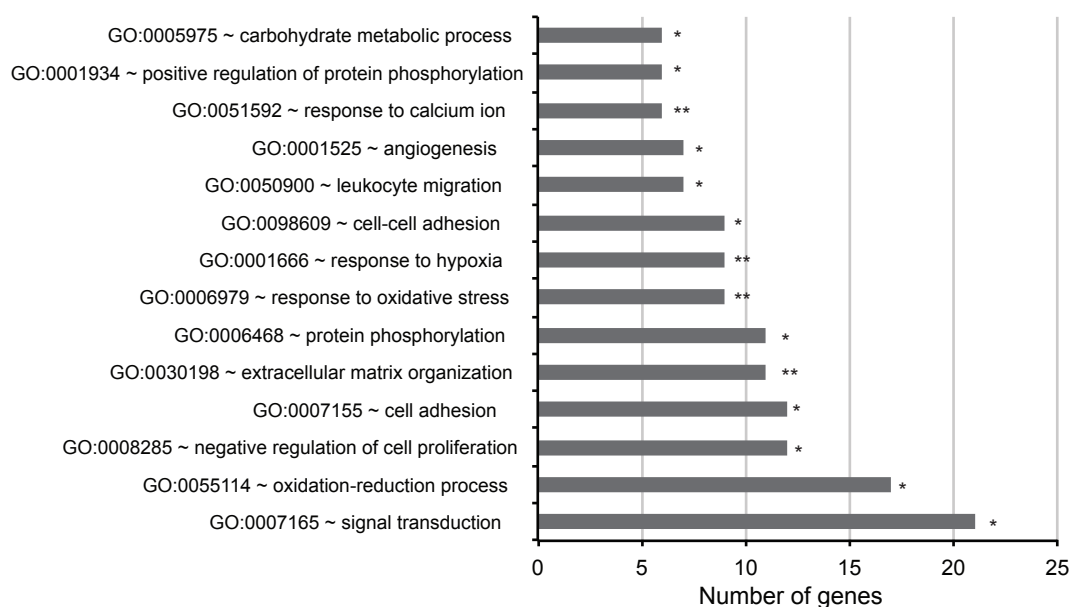

Supplementary Fig. 2. Classification of the genes/pathways that correlate with resistance to AA activity in NCI-60 cancer cells. Pattern comparison available at the NCI-60 CellMiner web tool (<https://discover.nci.nih.gov/cellminer/>) was used to assess the correlation between gene expression and AA (33832) activity. Significant negative Pearson's correlations are defined at  $r < -0.334$  based on a minimum of 35 informative cell lines (for both forms of information) yielding  $P$  value  $< 0.05$  in the absence of multiple comparisons. Expression of 246 genes correlates negatively and significantly with AA cytotoxicity (Pearson's correlations  $r < -0.334$ ,  $P$  value  $< 0.05$  in the absence of multiple comparisons). (A) Using the IPA, the 246 genes were classified. The top 5 significantly ( $P < 0.05$ ) enriched canonical pathways, molecular and cellular functions and networks of these genes are represented. (B) These genes were mapped according to their GO biological process pathways in DAVID database. The top significantly ( $P < 0.05$ ) associated biological processes were represented. \*,  $P < 0.05$ ; \*\*,  $P < 0.01$ .

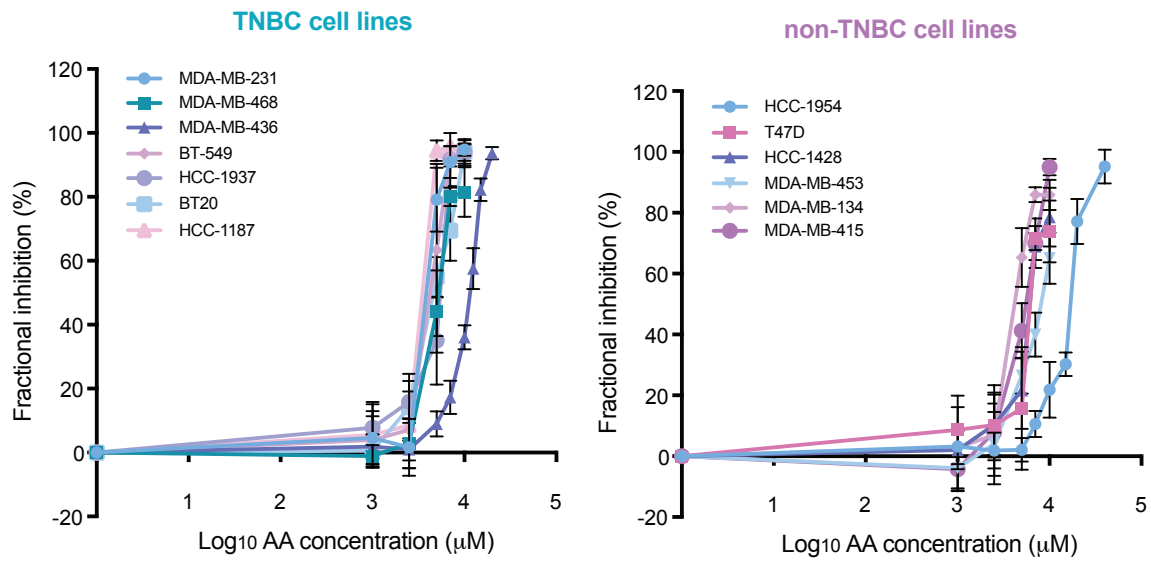

|                                        | MDA-MB-231       | MDA-MB-468      | MDA-MB-436       | BT-549          | HCC-1937       | BT20           | HCC-1187       | HCC-1954        | T47D           | HCC-1428        | MDA-MB-453       | MDA-MB-134      | MDA-MB-415      |
|----------------------------------------|------------------|-----------------|------------------|-----------------|----------------|----------------|----------------|-----------------|----------------|-----------------|------------------|-----------------|-----------------|
| LogIC50 (μM)                           | 3.624            | 3.693           | 4.081            | 3.655           | 3.724          | 3.766          | 3.518          | 4.216           | 3.75           | 3.757           | 3.925            | 3.615           | 3.792           |
| IC50 (μM)                              | 4208             | 4931            | 12037            | 4523            | 5302           | 5836           | 3298           | 17464           | 5619           | 5716            | 8421             | 4121            | 6196            |
| 95% Confidence Intervals (IC50) Bottom | -0.7069 to 3.932 | -2.303 to 3.393 | -0.3322 to 2.586 | -3.573 to 8.461 | 4.873 to 9.894 | -4.91 to 3.048 | 0.144 to 5.36  | -0.251 to 6.527 | 2.564 to 9.785 | 0.2506 to 8.984 | -5.315 to 0.5627 | -2.247 to 5.446 | -5.18 to 0.6338 |
| 95% Confidence Intervals (IC50) Top    | 90.35 to 96.52   | 76.61 to 89.55  | 103 to 124.7     | 87.51 to 106.9  | 89.57 to 99.09 | 97.5 to 199.1  | 93.46 to 98.73 | 95.45 to 114.5  | 67.08 to 82.19 | 71.95 to 87.56  | 74.65 to 646.9   | 82.94 to 93.74  | 104.9 to 153.3  |
| R square                               | 0.9789           | 0.96            | 0.9092           | 0.9213          | 0.9527         | 0.9685         | 0.9866         | 0.4177          | 0.8627         | 0.9251          | 0.9113           | 0.9403          | 0.9677          |

Supplementary Fig. 3. Sensitivity of TNBC and non-TNBC cell lines to AA. Seven TNBC cell lines (left panel) and 6 non-TNBC cells (right panel) were treated with increasing concentration of AA for 24 hours. Cell viability (%) relative to non-treated cells was measured with MTT assay. The graphs representing cell growth inhibition (100% – cell viability %) against log10 of AA concentration (μM). IC50 of each cell line, 95% confidence interval and R square were generated by GraphPad software. Data are means ± SD of at least 3 independent experiments.

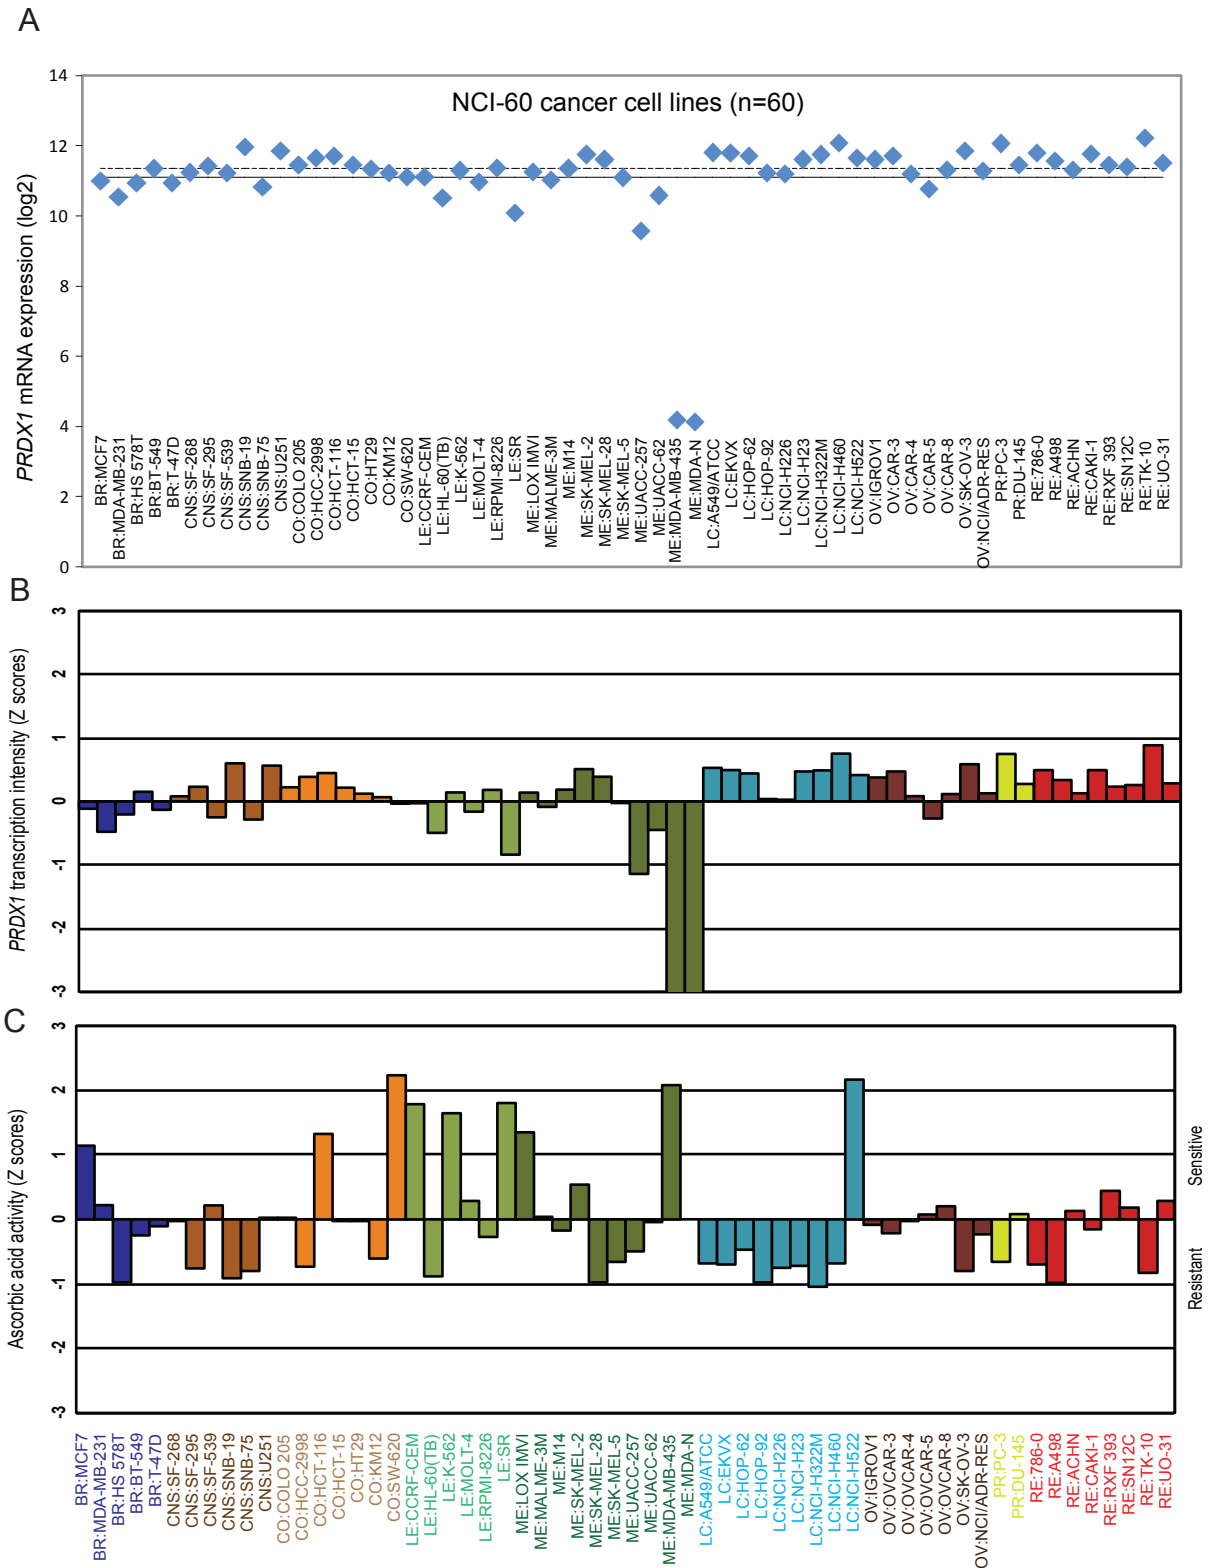

Supplementary Fig. 4. *PRDX1* expression versus NCI-60 cancer cell response to AA. **(A)** *PRDX1* mRNA expression patterns (log<sub>2</sub> values) using transcriptomic data of NCI-60 cancer cell lines. Mean and median values are shown as solid and dashed lines, respectively. **(B-C)** *PRDX1* mRNA expression patterns (average transcript intensity Z scores) **(B)** and AA activity (Z score) **(C)** in NCI-60 cancer cell lines. Cancer cells type is indicated in different colors, the cell line abbreviations are as follows: BR, breast; CNS, central nervous system; CO, colon; LE, leukemia; ME, melanoma; LC, lung cancer; OV, ovarian; PR, prostate; RE, renal. Lung cancer cells (7/9 cancer cell lines) have high *PRDX1* expression and are mostly resistant to AA activity (8/9 cancer cell lines) (in blue). For other cancer types, the correlations between *PRDX1* expression and AA activity is not conclusive due to limited number of cell lines available for each cancer type.
