# Supplementary material for: Redox modifications of cysteine-containing proteins, cell cycle arrest and translation inhibition: Involvement in vitamin C-induced breast cancer cell death
Source: PubMed Central journal article supplement — Redox Biol. 2019 Aug 2;26:101290. doi: 10.1016/j.redox.2019.101290 (PMC6831881; doi:10.1016/j.redox.2019.101290), 2019-08-02
Supplement: mmc3.pdf [file mmc3.pdf]

**Supplementary Table 1.** List of the differentially oxidized cysteine-containing proteins in MDA-MB-231 cells upon AA treatment identified by mass spectrometry “redoxome”

| 203/2910 proteins accession | Peptide count | Unique peptides | Confidence score | Anova ( <i>P</i> value) |          | Fold change (ratio)* |        | Highest mean condition | Lowest mean condition | Gene     |
|-----------------------------|---------------|-----------------|------------------|-------------------------|----------|----------------------|--------|------------------------|-----------------------|----------|
|                             |               |                 |                  | Exp1                    | Exp2     | Exp1                 | Exp2   |                        |                       |          |
| Q9BW04                      | 1             | 1               | 1.996            | 7.29E-06                | 1.28E-04 | 4.552                | 3.942  | AA                     | NT                    | SARG     |
| Q9NU22                      | 1             | 1               | 2.221            | 1.60E-05                | 4.58E-06 | 6.246                | 3.770  | AA                     | NT                    | MDN1     |
| Q13838                      | 7             | 7               | 39.611           | 2.29E-05                | 1.45E-03 | -2.520               | -2.274 | NT                     | AA                    | DDDX39B  |
| P13647                      | 22            | 22              | 77.643           | 2.31E-05                | 7.48E-05 | 2.184                | 4.198  | AA                     | NT                    | KRT5     |
| P04259                      | 23            | 23              | 95.879           | 2.74E-05                | 6.92E-04 | 1.892                | 2.917  | AA                     | NT                    | KRT6B    |
| Q8IXI1                      | 2             | 2               | 6.320            | 4.90E-05                | 3.29E-02 | -4.547               | -4.524 | NT                     | AA                    | RHOT2    |
| P13639                      | 52            | 52              | 236.125          | 6.75E-05                | 2.07E-05 | -3.088               | -1.520 | NT                     | AA                    | EEF2     |
| P07477                      | 1             | 1               | 3.752            | 7.45E-05                | 2.33E-04 | 6.721                | 3.084  | AA                     | NT                    | PRSS1    |
| P31151                      | 3             | 3               | 9.102            | 1.18E-04                | 6.36E-03 | 5.929                | 6.698  | AA                     | NT                    | S100A7   |
| O60610                      | 9             | 9               | 35.783           | 1.39E-04                | 8.50E-03 | -2.925               | -1.813 | NT                     | AA                    | DIAPH1   |
| Q6XZF7                      | 26            | 26              | 106.600          | 1.72E-04                | 2.08E-04 | 4.037                | 3.034  | AA                     | NT                    | DNMBP    |
| P01040                      | 2             | 2               | 6.694            | 1.74E-04                | 3.44E-05 | 7.105                | 5.313  | AA                     | NT                    | CSTA     |
| Q86Y46                      | 3             | 3               | 9.558            | 1.77E-04                | 1.52E-04 | 2.401                | 5.967  | AA                     | NT                    | KRT73    |
| P11217                      | 2             | 1               | 6.664            | 1.84E-04                | 2.15E-04 | 4.974                | 5.678  | AA                     | NT                    | PYGM     |
| Q92615                      | 5             | 5               | 16.931           | 1.88E-04                | 3.47E-03 | 4.655                | 2.273  | AA                     | NT                    | LARP4B   |
| Q13177                      | 9             | 8               | 28.990           | 2.22E-04                | 1.40E-03 | 7.789                | 2.808  | AA                     | NT                    | PAK2     |
| Q6UWB1                      | 1             | 1               | 5.803            | 2.25E-04                | 1.47E-04 | -3.521               | -2.024 | NT                     | AA                    | IL27RA   |
| P02538                      | 5             | 5               | 16.851           | 2.30E-04                | 1.57E-04 | 2.318                | 2.243  | AA                     | NT                    | KRT6A    |
| Q09028                      | 3             | 3               | 9.705            | 2.52E-04                | 5.78E-04 | 5.144                | 3.921  | AA                     | NT                    | RBBP4    |
| Q08554                      | 3             | 3               | 18.849           | 2.73E-04                | 4.06E-03 | 1.786                | 3.385  | AA                     | NT                    | DSC1     |
| Q02878                      | 8             | 8               | 28.829           | 2.77E-04                | 1.30E-04 | -2.274               | -2.551 | NT                     | AA                    | RPL6     |
| O95864                      | 2             | 2               | 5.846            | 2.86E-04                | 1.19E-05 | 3.486                | 3.637  | AA                     | NT                    | FADS2    |
| P49023                      | 10            | 10              | 46.301           | 2.89E-04                | 5.75E-04 | -6.159               | -4.721 | NT                     | AA                    | PXN      |
| P13646                      | 4             | 4               | 11.807           | 2.94E-04                | 8.36E-05 | 8.510                | 7.021  | AA                     | NT                    | KRT13    |
| P35869                      | 2             | 2               | 10.285           | 3.34E-04                | 4.84E-03 | -5.436               | -5.451 | NT                     | AA                    | AHR      |
| Q00610                      | 80            | 80              | 444.484          | 3.89E-04                | 1.03E-03 | 4.258                | 2.653  | AA                     | NT                    | CLTC     |
| Q9Y6C5                      | 1             | 1               | 2.197            | 4.68E-04                | 5.74E-03 | 7.468                | 4.262  | AA                     | NT                    | PTCH2    |
| Q06830                      | 10            | 10              | 32.354           | 4.94E-04                | 2.59E-03 | 1.390                | 1.509  | AA                     | NT                    | PRDX1    |
| Q15020                      | 10            | 10              | 36.253           | 5.44E-04                | 1.67E-03 | 1.860                | 1.301  | AA                     | NT                    | SART3    |
| Q96DI7                      | 6             | 6               | 25.471           | 5.57E-04                | 2.93E-03 | 2.281                | 2.145  | AA                     | NT                    | SNRNP40  |
| Q9NQ29                      | 3             | 3               | 10.851           | 5.64E-04                | 2.01E-02 | -2.501               | -2.475 | NT                     | AA                    | LUC7L    |
| Q5JWF2                      | 3             | 3               | 12.364           | 6.28E-04                | 4.41E-04 | -2.179               | -2.261 | NT                     | AA                    | GNAS     |
| O43379                      | 5             | 5               | 19.970           | 6.54E-04                | 1.46E-03 | 3.703                | 3.640  | AA                     | NT                    | WDR62    |
| P23193                      | 6             | 6               | 19.020           | 6.60E-04                | 2.37E-04 | -2.604               | -2.162 | NT                     | AA                    | TCEA1    |
| Q13564                      | 1             | 1               | 3.625            | 6.60E-04                | 1.81E-02 | -∞                   | -6.885 | NT                     | AA                    | NAE1     |
| P18124                      | 3             | 3               | 13.442           | 6.63E-04                | 2.43E-03 | -1.523               | -1.428 | NT                     | AA                    | RPL7     |
| P02768                      | 9             | 9               | 35.689           | 6.82E-04                | 1.64E-04 | 2.268                | 3.064  | AA                     | NT                    | ALB      |
| Q9UPN6                      | 2             | 2               | 6.145            | 6.92E-04                | 7.60E-04 | 3.927                | 3.365  | AA                     | NT                    | SCAF8    |
| P25391                      | 1             | 1               | 2.618            | 7.06E-04                | 6.70E-03 | -2.716               | -1.680 | NT                     | AA                    | LAMA1    |
| Q5THJ4                      | 1             | 1               | 1.831            | 7.15E-04                | 2.25E-04 | 10.890               | 4.842  | AA                     | NT                    | VPS13D   |
| P62805                      | 2             | 2               | 6.618            | 7.46E-04                | 5.20E-03 | 3.360                | 2.009  | AA                     | NT                    | HIST1H4A |
| Q9BW60                      | 3             | 3               | 9.135            | 7.56E-04                | 1.43E-05 | -3.253               | -3.062 | NT                     | AA                    | ELOVL1   |
| Q8TDD1                      | 2             | 2               | 6.148            | 8.20E-04                | 9.07E-03 | 2.643                | -4.138 | NT                     | AA                    | DDX54    |
| Q9BQE3                      | 3             | 3               | 16.125           | 9.41E-04                | 3.95E-02 | 3.622                | -1.680 | NT                     | AA                    | TUBA1C   |
| Q13418                      | 1             | 1               | 3.581            | 9.71E-04                | 3.51E-02 | -6.399               | -1.977 | NT                     | AA                    | ILK      |
| P04264                      | 38            | 37              | 194.664          | 9.76E-04                | 1.79E-04 | 1.865                | 4.081  | AA                     | NT                    | KRT1     |
| P49755                      | 9             | 9               | 57.697           | 9.99E-04                | 3.25E-03 | 3.060                | 1.915  | AA                     | NT                    | TMED10   |
| O95239                      | 16            | 16              | 55.939           | 1.04E-03                | 7.73E-05 | 2.873                | 2.638  | AA                     | NT                    | KIF4A    |

|        |    |    |         |          |          |         |        |    |    |                |
|--------|----|----|---------|----------|----------|---------|--------|----|----|----------------|
| Q00341 | 28 | 28 | 108.684 | 1.12E-03 | 1.06E-03 | 1.701   | 1.249  | AA | NT | <i>HDLBP</i>   |
| Q96597 | 6  | 5  | 37.590  | 1.12E-03 | 4.34E-02 | 1.524   | 1.216  | AA | NT | <i>MYADM</i>   |
| P25311 | 4  | 4  | 14.537  | 1.17E-03 | 2.13E-03 | 3.071   | 4.510  | AA | NT | <i>AZGP1</i>   |
| P63010 | 18 | 18 | 83.544  | 1.19E-03 | 3.65E-02 | -1.594  | -1.472 | NT | AA | <i>AP2B1</i>   |
| O95235 | 4  | 4  | 12.276  | 1.20E-03 | 3.37E-02 | -3.415  | -2.820 | NT | AA | <i>KIF20A</i>  |
| O60244 | 2  | 2  | 6.465   | 1.21E-03 | 4.57E-02 | -2.934  | -3.103 | NT | AA | <i>MED14</i>   |
| Q15031 | 6  | 6  | 17.999  | 1.23E-03 | 4.12E-04 | -2.886  | -2.749 | NT | AA | <i>LARS2</i>   |
| P63241 | 2  | 2  | 13.683  | 1.24E-03 | 2.61E-02 | -2.563  | -2.173 | NT | AA | <i>EIF5A</i>   |
| Q9Y352 | 2  | 2  | 8.207   | 1.44E-03 | 1.98E-03 | 5.208   | 2.570  | AA | NT | <i>ZNF330</i>  |
| Q14562 | 5  | 5  | 14.878  | 1.47E-03 | 1.25E-02 | 2.054   | 1.808  | AA | NT | <i>DHX8</i>    |
| P35527 | 43 | 42 | 251.493 | 1.72E-03 | 9.19E-04 | 1.977   | 3.163  | AA | NT | <i>KRT9</i>    |
| Q9BV44 | 2  | 2  | 6.670   | 1.74E-03 | 4.38E-02 | -1.781  | -1.753 | NT | AA | <i>THUMPD3</i> |
| Q02543 | 3  | 3  | 8.052   | 1.77E-03 | 3.97E-04 | -2.632  | -2.994 | NT | AA | <i>RPL18A</i>  |
| O94804 | 8  | 8  | 34.949  | 1.98E-03 | 8.05E-05 | -3.279  | -3.078 | NT | AA | <i>STK10</i>   |
| P35221 | 2  | 2  | 7.775   | 2.13E-03 | 2.02E-02 | -1.939  | -1.526 | NT | AA | <i>CTNNA1</i>  |
| P25774 | 1  | 1  | 3.198   | 2.14E-03 | 1.26E-02 | 2.175   | 3.028  | AA | NT | <i>CTSS</i>    |
| Q9P059 | 1  | 1  | 4.626   | 2.17E-03 | 9.82E-04 | -3.904  | -4.821 | NT | AA | <i>TMEM14C</i> |
| P49746 | 1  | 1  | 3.553   | 2.19E-03 | 1.07E-03 | -6.692  | -3.386 | NT | AA | <i>THBS3</i>   |
| P67809 | 5  | 5  | 19.741  | 2.22E-03 | 2.97E-02 | -2.643  | -5.197 | NT | AA | <i>YBX1</i>    |
| P06748 | 8  | 8  | 53.653  | 2.22E-03 | 2.49E-03 | -1.922  | -1.848 | NT | AA | <i>NPM1</i>    |
| O96013 | 5  | 5  | 15.910  | 2.26E-03 | 1.61E-04 | -2.421  | -2.812 | NT | AA | <i>PAK4</i>    |
| P27824 | 19 | 18 | 92.471  | 2.29E-03 | 4.12E-03 | -1.928  | -1.395 | NT | AA | <i>CANX</i>    |
| P51858 | 2  | 2  | 7.359   | 2.31E-03 | 1.69E-03 | -12.271 | -4.545 | NT | AA | <i>HDGF</i>    |
| Q8WXF1 | 3  | 3  | 10.616  | 2.32E-03 | 3.41E-03 | 1.761   | 1.528  | AA | NT | <i>PSPC1</i>   |
| Q96GQ7 | 6  | 6  | 19.600  | 2.57E-03 | 4.61E-04 | -3.201  | -2.178 | NT | AA | <i>DDX27</i>   |
| P08779 | 14 | 14 | 70.232  | 2.59E-03 | 4.08E-05 | 2.498   | 3.147  | AA | NT | <i>KRT16</i>   |
| P13645 | 32 | 31 | 224.164 | 2.64E-03 | 4.74E-05 | 1.893   | 5.674  | AA | NT | <i>KRT10</i>   |
| P46777 | 12 | 12 | 52.106  | 2.64E-03 | 1.14E-04 | -1.561  | -1.810 | NT | AA | <i>RPL5</i>    |
| Q9H0A0 | 21 | 20 | 87.022  | 2.74E-03 | 1.12E-03 | -2.015  | -1.281 | NT | AA | <i>NAT10</i>   |
| O43242 | 9  | 9  | 30.106  | 2.74E-03 | 4.95E-05 | 1.616   | 3.515  | AA | NT | <i>PSMD3</i>   |
| P21266 | 3  | 3  | 10.505  | 2.75E-03 | 1.13E-02 | 3.489   | 1.784  | AA | NT | <i>GSTM3</i>   |
| P11310 | 5  | 5  | 17.825  | 2.77E-03 | 3.32E-04 | -1.869  | -1.653 | NT | AA | <i>ACADM</i>   |
| O95425 | 12 | 12 | 44.565  | 2.81E-03 | 1.31E-02 | 1.915   | 1.977  | AA | NT | <i>SVIL</i>    |
| P50570 | 11 | 11 | 36.734  | 2.84E-03 | 1.19E-03 | -2.199  | -1.626 | NT | AA | <i>DNM2</i>    |
| P84103 | 2  | 2  | 6.413   | 2.93E-03 | 2.41E-02 | -1.524  | -1.665 | NT | AA | <i>SRSF3</i>   |
| Q9UKF6 | 5  | 5  | 12.233  | 2.96E-03 | 4.34E-02 | -1.864  | -1.699 | NT | AA | <i>CPSF3</i>   |
| Q8WUM4 | 24 | 23 | 111.252 | 3.30E-03 | 3.43E-02 | -1.874  | -1.241 | NT | AA | <i>PDCD6IP</i> |
| Q14527 | 2  | 2  | 5.969   | 3.35E-03 | 2.48E-02 | -2.752  | -3.174 | NT | AA | <i>HLTF</i>    |
| P06702 | 3  | 3  | 18.686  | 3.36E-03 | 2.81E-04 | 2.543   | 3.790  | AA | NT | <i>SI00A9</i>  |
| P81605 | 3  | 3  | 15.848  | 3.68E-03 | 7.35E-03 | 6.449   | 3.494  | AA | NT | <i>DCD</i>     |
| O43159 | 3  | 3  | 11.794  | 3.70E-03 | 4.98E-02 | -3.162  | -2.146 | NT | AA | <i>RRP8</i>    |
| P31944 | 4  | 4  | 10.345  | 3.93E-03 | 4.22E-04 | 3.099   | 3.353  | AA | NT | <i>CASP14</i>  |
| Q9UHN6 | 1  | 1  | 3.683   | 3.97E-03 | 1.20E-03 | 4.116   | 3.897  | AA | NT | <i>TMEM2</i>   |
| O00154 | 13 | 13 | 48.689  | 4.06E-03 | 1.29E-03 | 1.886   | 1.644  | AA | NT | <i>ACOT7</i>   |
| Q99496 | 3  | 3  | 9.896   | 4.08E-03 | 3.29E-02 | 2.249   | 1.588  | AA | NT | <i>RNF2</i>    |
| Q8IY81 | 4  | 3  | 14.473  | 4.22E-03 | 1.54E-02 | -2.436  | -1.922 | NT | AA | <i>FTSJ3</i>   |
| Q09161 | 2  | 2  | 6.251   | 4.32E-03 | 2.57E-02 | -1.830  | -1.394 | NT | AA | <i>NCBP1</i>   |
| Q9BTW9 | 11 | 11 | 37.907  | 4.37E-03 | 5.62E-03 | 5.025   | 2.148  | AA | NT | <i>TBCD</i>    |
| Q9UMS4 | 8  | 8  | 30.423  | 4.51E-03 | 7.62E-03 | -2.094  | -1.544 | NT | AA | <i>PRPF19</i>  |
| P83731 | 4  | 4  | 12.553  | 4.73E-03 | 7.99E-04 | -1.927  | -1.929 | NT | AA | <i>RPL24</i>   |
| P08651 | 2  | 2  | 7.250   | 4.85E-03 | 6.96E-03 | -2.502  | -2.243 | NT | AA | <i>NFIC</i>    |
| Q7Z794 | 8  | 8  | 28.975  | 5.31E-03 | 2.95E-04 | 1.857   | 4.451  | AA | NT | <i>KRT77</i>   |
| O95782 | 17 | 17 | 55.498  | 5.33E-03 | 2.02E-03 | -1.861  | -1.305 | NT | AA | <i>AP2A1</i>   |
| P28340 | 21 | 20 | 73.273  | 5.41E-03 | 1.83E-02 | -3.352  | -1.941 | NT | AA | <i>POLD1</i>   |
| P53041 | 7  | 7  | 25.846  | 5.54E-03 | 1.35E-02 | -1.556  | -1.462 | NT | AA | <i>PPP5C</i>   |
| Q13017 | 8  | 6  | 28.342  | 5.67E-03 | 7.43E-04 | -1.692  | -2.544 | NT | AA | <i>ARHGAP5</i> |
| O43795 | 20 | 20 | 72.327  | 5.89E-03 | 1.49E-02 | -2.363  | -1.755 | NT | AA | <i>MYO1B</i>   |

|        |    |    |         |          |          |        |        |    |    |          |
|--------|----|----|---------|----------|----------|--------|--------|----|----|----------|
| Q13823 | 2  | 2  | 9.984   | 6.35E-03 | 3.48E-02 | -4.854 | -2.537 | NT | AA | GNL2     |
| P98170 | 2  | 2  | 5.586   | 6.43E-03 | 4.42E-02 | 1.810  | 1.664  | AA | NT | XIAP     |
| O14745 | 3  | 3  | 11.895  | 6.58E-03 | 5.89E-03 | -1.546 | -1.624 | NT | AA | SLC9A3R1 |
| Q01970 | 18 | 18 | 72.585  | 6.59E-03 | 8.10E-03 | -1.727 | -1.710 | NT | AA | PLCB3    |
| P36871 | 18 | 18 | 66.966  | 6.61E-03 | 8.78E-03 | -1.587 | -1.518 | NT | AA | PGM1     |
| Q99536 | 5  | 5  | 20.491  | 6.62E-03 | 3.52E-02 | -1.611 | -1.290 | NT | AA | VATI     |
| P02788 | 4  | 4  | 9.577   | 6.75E-03 | 4.81E-03 | 2.333  | 2.264  | AA | NT | LTF      |
| P10515 | 6  | 6  | 22.129  | 6.76E-03 | 9.80E-03 | 1.814  | 2.098  | AA | NT | DLAT     |
| P62191 | 7  | 5  | 22.680  | 6.77E-03 | 3.42E-02 | -1.528 | -1.747 | NT | AA | PSMC1    |
| P68036 | 2  | 2  | 9.315   | 6.81E-03 | 2.12E-02 | -2.051 | -2.302 | NT | AA | UBE2L3   |
| P02533 | 25 | 25 | 119.236 | 6.84E-03 | 1.58E-05 | 2.349  | 4.722  | AA | NT | KRT14    |
| P78344 | 4  | 4  | 12.918  | 6.91E-03 | 2.21E-02 | -1.759 | -1.383 | NT | AA | EIF4G2   |
| Q13619 | 3  | 3  | 9.886   | 7.09E-03 | 4.32E-04 | 1.290  | 3.902  | AA | NT | CUL4A    |
| P49792 | 18 | 17 | 55.155  | 7.25E-03 | 3.37E-02 | 1.611  | 1.350  | AA | NT | RANBP2   |
| P14314 | 15 | 15 | 69.002  | 7.48E-03 | 8.86E-03 | -1.680 | -1.395 | NT | AA | PRKCSH   |
| P39656 | 7  | 7  | 24.105  | 7.51E-03 | 4.87E-02 | -1.528 | -1.322 | NT | AA | DDOST    |
| O43143 | 31 | 31 | 123.335 | 7.58E-03 | 2.55E-02 | -1.607 | -1.556 | NT | AA | DHX15    |
| P00558 | 18 | 17 | 80.151  | 7.70E-03 | 7.11E-03 | 1.543  | 1.471  | AA | NT | PGK1     |
| Q96LD4 | 3  | 3  | 12.616  | 7.78E-03 | 2.09E-02 | -2.885 | -2.003 | NT | AA | TRIM47   |
| Q8N3E9 | 1  | 1  | 5.353   | 8.03E-03 | 4.91E-02 | -2.001 | -1.983 | NT | AA | PLCD3    |
| P37802 | 14 | 14 | 47.068  | 8.05E-03 | 5.22E-03 | -1.688 | -2.146 | NT | AA | TAGLN2   |
| O43790 | 5  | 3  | 20.952  | 8.06E-03 | 1.38E-03 | 9.428  | 16.385 | AA | NT | KRT86    |
| Q01518 | 11 | 11 | 51.029  | 8.11E-03 | 1.38E-02 | -1.666 | -1.522 | NT | AA | CAP1     |
| O00622 | 8  | 8  | 23.311  | 8.43E-03 | 5.84E-03 | 1.571  | 1.642  | AA | NT | CYR61    |
| Q14152 | 32 | 31 | 122.585 | 8.47E-03 | 1.30E-02 | -2.349 | -2.296 | NT | AA | EIF3A    |
| Q86WG5 | 2  | 2  | 4.475   | 8.76E-03 | 1.23E-04 | -2.102 | -3.650 | NT | AA | SBF2     |
| P36578 | 10 | 10 | 41.560  | 9.18E-03 | 4.32E-03 | -2.116 | -2.651 | NT | AA | RPL4     |
| P98194 | 2  | 2  | 7.809   | 1.00E-02 | 4.47E-02 | -2.527 | -2.719 | NT | AA | ATP2C1   |
| O95232 | 4  | 4  | 17.968  | 1.03E-02 | 4.32E-03 | -1.952 | -3.019 | NT | AA | LUC7L3   |
| Q9Y5P6 | 3  | 3  | 10.236  | 1.03E-02 | 3.32E-02 | -1.959 | -1.704 | NT | AA | GMPPB    |
| P30740 | 4  | 4  | 13.121  | 1.08E-02 | 3.23E-03 | -2.235 | -2.040 | NT | AA | SERPINB1 |
| Q96EE3 | 3  | 3  | 10.127  | 1.13E-02 | 2.37E-02 | 2.111  | 1.774  | AA | NT | SEH1L    |
| P50454 | 13 | 13 | 53.016  | 1.18E-02 | 1.24E-02 | -1.432 | -1.691 | NT | AA | SERPINH1 |
| P29508 | 3  | 3  | 7.367   | 1.18E-02 | 5.69E-05 | 2.667  | 3.293  | AA | NT | SERPINB3 |
| O95163 | 9  | 9  | 34.919  | 1.21E-02 | 2.96E-02 | 1.563  | 1.341  | AA | NT | IKBKAP   |
| P13797 | 8  | 8  | 27.422  | 1.28E-02 | 8.38E-03 | -1.502 | -1.274 | NT | AA | PLS3     |
| P68104 | 14 | 14 | 84.833  | 1.29E-02 | 2.70E-04 | -1.729 | -1.506 | NT | AA | EEF1A1   |
| P01023 | 2  | 2  | 5.709   | 1.30E-02 | 2.16E-03 | 1.533  | 2.009  | AA | NT | A2M      |
| P01008 | 1  | 1  | 2.817   | 1.31E-02 | 5.74E-03 | 1.724  | 2.608  | AA | NT | SERPINCI |
| Q6KB66 | 4  | 3  | 13.749  | 1.33E-02 | 1.65E-03 | 1.617  | 3.168  | AA | NT | KRT80    |
| Q09666 | 78 | 77 | 288.601 | 1.45E-02 | 3.36E-03 | 2.058  | 1.725  | AA | NT | AHNAK    |
| Q969V3 | 6  | 6  | 19.834  | 1.45E-02 | 4.97E-02 | -2.671 | -2.078 | NT | AA | NCLN     |
| O15355 | 13 | 13 | 52.222  | 1.49E-02 | 8.87E-03 | -1.691 | -1.764 | NT | AA | PPM1G    |
| Q6WCQ1 | 23 | 23 | 88.468  | 1.60E-02 | 1.30E-03 | 1.626  | 1.958  | AA | NT | MPRIP    |
| P07910 | 4  | 4  | 12.325  | 1.70E-02 | 7.79E-03 | -1.888 | -1.402 | NT | AA | HNRNPC   |
| O75223 | 1  | 1  | 3.569   | 1.73E-02 | 5.22E-05 | 1.726  | 2.547  | AA | NT | GGCT     |
| Q9GZT9 | 2  | 2  | 8.291   | 1.81E-02 | 3.31E-02 | -1.784 | -1.740 | NT | AA | EGLN1    |
| Q13485 | 1  | 1  | 6.432   | 1.86E-02 | 2.38E-02 | -2.806 | -1.760 | NT | AA | SMAD4    |
| Q7L014 | 4  | 4  | 14.266  | 1.91E-02 | 2.26E-02 | -2.743 | -2.149 | NT | AA | DDX46    |
| P36915 | 6  | 4  | 21.630  | 1.94E-02 | 4.33E-02 | -1.366 | -1.552 | NT | AA | GNL1     |
| P41091 | 11 | 11 | 56.262  | 1.95E-02 | 4.63E-03 | -1.928 | -1.880 | NT | AA | EIF2S3   |
| P62424 | 4  | 4  | 14.287  | 1.98E-02 | 2.48E-02 | -2.499 | -3.076 | NT | AA | RPL7A    |
| Q6ZN55 | 1  | 1  | 5.257   | 1.98E-02 | 2.93E-02 | -3.006 | -1.894 | NT | AA | ZNF574   |
| P61088 | 2  | 2  | 7.033   | 2.00E-02 | 3.62E-03 | -1.257 | -2.085 | NT | AA | UBE2N    |
| P42025 | 1  | 1  | 2.105   | 2.05E-02 | 1.40E-02 | -1.673 | -1.971 | NT | AA | ACTR1B   |
| Q8N556 | 5  | 5  | 16.469  | 2.05E-02 | 3.52E-02 | -1.881 | -2.640 | NT | AA | AFAP1    |
| Q9NVE7 | 3  | 3  | 9.949   | 2.07E-02 | 5.36E-05 | -1.562 | -2.031 | NT | AA | PANK4    |

|               |    |    |         |          |          |                |                |    |    |                |
|---------------|----|----|---------|----------|----------|----------------|----------------|----|----|----------------|
| <b>P78386</b> | 11 | 10 | 32.083  | 2.08E-02 | 2.13E-02 | <b>3.616</b>   | <b>2.466</b>   | AA | NT | <b>KRT85</b>   |
| <b>Q9NRX1</b> | 1  | 1  | 4.414   | 2.15E-02 | 1.81E-03 | <b>-2.972</b>  | <b>-2.581</b>  | NT | AA | <b>PNO1</b>    |
| <b>P12270</b> | 21 | 20 | 83.170  | 2.24E-02 | 3.13E-02 | <b>1.539</b>   | <b>1.313</b>   | AA | NT | <b>TPR</b>     |
| <b>Q6ZT21</b> | 2  | 2  | 7.851   | 2.31E-02 | 8.67E-05 | <b>-2.018</b>  | <b>-2.170</b>  | NT | AA | <b>TMPPE</b>   |
| <b>P78417</b> | 3  | 2  | 8.272   | 2.41E-02 | 1.22E-03 | <b>-1.506</b>  | <b>-2.500</b>  | NT | AA | <b>GSTO1</b>   |
| <b>Q15075</b> | 14 | 14 | 51.175  | 2.45E-02 | 1.02E-02 | <b>-1.509</b>  | <b>-1.310</b>  | NT | AA | <b>EEA1</b>    |
| <b>P61204</b> | 8  | 8  | 31.744  | 2.52E-02 | 3.01E-02 | <b>-2.009</b>  | <b>-2.035</b>  | NT | AA | <b>ARF3</b>    |
| <b>Q5D862</b> | 7  | 6  | 25.699  | 2.54E-02 | 3.49E-03 | <b>2.123</b>   | <b>2.288</b>   | AA | NT | <b>FLG2</b>    |
| <b>Q9H9B4</b> | 4  | 3  | 14.739  | 2.60E-02 | 1.15E-02 | <b>-2.364</b>  | <b>-1.787</b>  | NT | AA | <b>SFXN1</b>   |
| <b>Q96ME7</b> | 1  | 1  | 3.362   | 2.66E-02 | 8.88E-04 | <b>-1.820</b>  | <b>-2.311</b>  | NT | AA | <b>ZNF512</b>  |
| <b>Q9Y697</b> | 1  | 1  | 2.839   | 2.76E-02 | 2.05E-02 | <b>-1.941</b>  | <b>-2.261</b>  | NT | AA | <b>NFS1</b>    |
| <b>P61313</b> | 1  | 1  | 3.849   | 2.79E-02 | 7.78E-03 | <b>-2.415</b>  | <b>-2.182</b>  | NT | AA | <b>RPL15</b>   |
| <b>Q96G23</b> | 2  | 2  | 6.285   | 2.79E-02 | 4.73E-02 | <b>-2.235</b>  | <b>-2.345</b>  | NT | AA | <b>CERS2</b>   |
| <b>Q15293</b> | 2  | 2  | 6.220   | 2.83E-02 | 2.93E-02 | <b>-1.901</b>  | <b>-1.630</b>  | NT | AA | <b>RCN1</b>    |
| <b>Q9NVX2</b> | 3  | 3  | 12.310  | 2.83E-02 | 5.42E-03 | <b>-1.962</b>  | <b>-2.033</b>  | NT | AA | <b>NLE1</b>    |
| <b>P35908</b> | 37 | 36 | 200.209 | 2.98E-02 | 1.42E-04 | <b>1.462</b>   | <b>4.635</b>   | AA | NT | <b>KRT2</b>    |
| <b>P22087</b> | 2  | 2  | 6.176   | 2.99E-02 | 2.24E-03 | <b>-1.582</b>  | <b>-3.316</b>  | NT | AA | <b>FBL</b>     |
| <b>P42338</b> | 1  | 1  | 3.392   | 3.07E-02 | 4.21E-02 | <b>-55.171</b> | <b>-25.564</b> | NT | AA | <b>PIK3CB</b>  |
| <b>P62241</b> | 5  | 5  | 22.811  | 3.10E-02 | 1.43E-03 | <b>-1.742</b>  | <b>-1.783</b>  | NT | AA | <b>RPS8</b>    |
| <b>P42167</b> | 7  | 7  | 25.550  | 3.26E-02 | 1.38E-02 | <b>-1.238</b>  | <b>-1.861</b>  | NT | AA | <b>TMPO</b>    |
| <b>P18074</b> | 2  | 2  | 5.997   | 3.31E-02 | 5.58E-03 | <b>-2.003</b>  | <b>-2.731</b>  | NT | AA | <b>ERCC2</b>   |
| <b>Q15797</b> | 1  | 1  | 3.218   | 3.43E-02 | 2.85E-02 | <b>-2.108</b>  | <b>-1.813</b>  | NT | AA | <b>SMAD1</b>   |
| <b>Q9UPN3</b> | 21 | 19 | 67.232  | 3.43E-02 | 2.95E-02 | <b>1.695</b>   | <b>1.412</b>   | AA | NT | <b>MACF1</b>   |
| <b>Q93034</b> | 3  | 3  | 10.318  | 3.48E-02 | 3.02E-03 | <b>-1.789</b>  | <b>-1.709</b>  | NT | AA | <b>CUL5</b>    |
| <b>Q9NVU7</b> | 2  | 2  | 5.529   | 3.66E-02 | 3.09E-02 | <b>-1.819</b>  | <b>-1.753</b>  | NT | AA | <b>SDAD1</b>   |
| <b>Q6PIU2</b> | 9  | 9  | 34.507  | 3.68E-02 | 8.48E-03 | <b>-1.445</b>  | <b>-1.541</b>  | NT | AA | <b>NCEH1</b>   |
| <b>Q86TM6</b> | 1  | 1  | 2.659   | 3.74E-02 | 2.65E-02 | <b>-3.107</b>  | <b>-1.971</b>  | NT | AA | <b>SYVN1</b>   |
| <b>Q5T457</b> | 20 | 19 | 67.339  | 3.77E-02 | 6.22E-04 | <b>1.298</b>   | <b>1.546</b>   | AA | NT | <b>UBR4</b>    |
| <b>Q9Y310</b> | 9  | 9  | 27.259  | 3.83E-02 | 2.27E-02 | <b>1.464</b>   | <b>1.894</b>   | AA | NT | <b>RTCB</b>    |
| <b>P15880</b> | 5  | 5  | 15.756  | 3.94E-02 | 5.09E-04 | <b>-1.697</b>  | <b>-2.694</b>  | NT | AA | <b>RPS2</b>    |
| <b>Q9Y6Y8</b> | 2  | 2  | 5.346   | 4.07E-02 | 2.40E-02 | <b>1.657</b>   | <b>1.806</b>   | AA | NT | <b>SEC23IP</b> |
| <b>P41743</b> | 2  | 2  | 9.662   | 4.08E-02 | 1.54E-02 | <b>1.199</b>   | <b>1.853</b>   | AA | NT | <b>PRKCI</b>   |
| <b>Q7Z7A4</b> | 3  | 3  | 9.438   | 4.24E-02 | 1.20E-02 | <b>-1.848</b>  | <b>-1.865</b>  | NT | AA | <b>PXK</b>     |
| <b>Q6L8Q7</b> | 9  | 8  | 39.743  | 4.28E-02 | 8.87E-03 | <b>-1.557</b>  | <b>-1.598</b>  | NT | AA | <b>PDE12</b>   |
| <b>O60684</b> | 1  | 1  | 3.633   | 4.37E-02 | 3.15E-02 | <b>-2.134</b>  | <b>-2.229</b>  | NT | AA | <b>KPNA6</b>   |
| <b>Q9UBU9</b> | 6  | 6  | 28.421  | 4.43E-02 | 5.51E-04 | <b>-1.594</b>  | <b>-2.035</b>  | NT | AA | <b>NXF1</b>    |
| <b>Q99575</b> | 10 | 10 | 41.746  | 4.55E-02 | 1.02E-02 | <b>-1.278</b>  | <b>-1.504</b>  | NT | AA | <b>POPI</b>    |
| <b>P62330</b> | 3  | 3  | 8.310   | 4.68E-02 | 7.03E-03 | <b>-1.927</b>  | <b>-2.589</b>  | NT | AA | <b>ARF6</b>    |
| <b>P49902</b> | 9  | 8  | 33.621  | 4.71E-02 | 1.81E-02 | <b>-1.976</b>  | <b>-1.428</b>  | NT | AA | <b>NT5C2</b>   |
| <b>Q96N66</b> | 4  | 4  | 15.248  | 4.72E-02 | 3.19E-03 | <b>-1.297</b>  | <b>-2.278</b>  | NT | AA | <b>MBOAT7</b>  |
| <b>Q8N8A6</b> | 1  | 1  | 4.059   | 4.90E-02 | 7.77E-04 | <b>-3.613</b>  | <b>-10.084</b> | NT | AA | <b>DDX51</b>   |

\* “Redoxome”, the oxidized proteome of cysteine-containing proteins after 10 mM AA treatment for ½ hour in MDA-MB-231 cells were analyzed by mass spectrometry. 203 differentially oxidized proteins with a *P* value < 0.05 and a fold change (ratio) over 1.5 between non-treated (NT) and AA-treated cells (AA) in at least one of the two biological experiments (Exp1 and Exp2) were identified. The fold change (ratio) was considered positive when the oxidized protein quantity was found higher in AA-treated cells (highest mean condition: AA) and negative when the oxidized protein quantity was found higher in non-treated cells (highest mean condition: NT).

**Supplementary Table 2.** List of the 246 genes with significant negative Pearson's correlations with AA cytotoxicity in NCI-60 cancer cells

| <b>Gene symbol</b>  | <b>Pearson's correlations *</b> | <b>P value<sup>§</sup></b> |
|---------------------|---------------------------------|----------------------------|
| <i>PTGR1</i>        | -0.608                          | 0                          |
| <i>TRIM6-TRIM34</i> | -0.52                           | 0.000025                   |
| <i>NPTN</i>         | -0.511                          | 0.000035                   |
| <i>LRIG3</i>        | -0.504                          | 0.000047                   |
| <i>B4GALT1</i>      | -0.485                          | 0.000098                   |
| <i>ABHD4</i>        | -0.481                          | 0.000115                   |
| <i>FBXW10</i>       | -0.467                          | 0.000192                   |
| <i>ACTN4P2</i>      | -0.464                          | 0.000242                   |
| <i>LINC00575</i>    | -0.457                          | 0.000307                   |
| <i>EPHX1</i>        | -0.456                          | 0.000284                   |
| <i>TRIM16</i>       | -0.455                          | 0.000298                   |
| <i>CPD</i>          | -0.455                          | 0.000297                   |
| <i>ITFG1</i>        | -0.452                          | 0.000326                   |
| <i>LOC100130657</i> | -0.45                           | 0.00039                    |
| <i>ALDH3B1</i>      | -0.447                          | 0.000391                   |
| <i>PAPSS2</i>       | -0.444                          | 0.000427                   |
| <i>MGST1</i>        | -0.443                          | 0.000449                   |
| <i>USP40</i>        | -0.442                          | 0.000459                   |
| <i>LAPTM4A</i>      | -0.442                          | 0.000458                   |
| <i>CPEB2</i>        | -0.441                          | 0.000468                   |
| <i>IL6STP1</i>      | -0.44                           | 0.000488                   |
| <i>PKMP2</i>        | -0.439                          | 0.000565                   |
| <i>EFCAB14</i>      | -0.439                          | 0.000509                   |
| <i>S100A11</i>      | -0.437                          | 0.000539                   |
| <i>P3H2</i>         | -0.435                          | 0.000584                   |
| <i>EGFR</i>         | -0.435                          | 0.000571                   |
| <i>LINC00519</i>    | -0.431                          | 0.000723                   |
| <i>RPL21P115</i>    | -0.429                          | 0.000699                   |
| <i>LIF</i>          | -0.425                          | 0.000792                   |
| <i>TRIP6</i>        | -0.424                          | 0.000825                   |
| <i>CTSD</i>         | -0.424                          | 0.000822                   |
| <i>S100A11P1</i>    | -0.424                          | 0.00082                    |
| <i>TTY7</i>         | -0.42                           | 0.001016                   |
| <i>DHCR24</i>       | -0.42                           | 0.000919                   |
| <i>IL6ST</i>        | -0.418                          | 0.000992                   |
| <i>RIN2</i>         | -0.418                          | 0.000973                   |
| <i>ACTN3</i>        | -0.416                          | 0.001177                   |
| <i>PKMP5</i>        | -0.416                          | 0.001162                   |
| <i>ITM2B</i>        | -0.416                          | 0.001041                   |
| <i>ELOVL1</i>       | -0.415                          | 0.001067                   |

|                  |        |          |
|------------------|--------|----------|
| <i>ARSJ</i>      | -0.414 | 0.001106 |
| <i>KLF4</i>      | -0.414 | 0.001101 |
| <i>PKMP1</i>     | -0.413 | 0.001258 |
| <i>FAM71F2</i>   | -0.413 | 0.001257 |
| <i>CCDC149</i>   | -0.413 | 0.001158 |
| <i>TRIM6</i>     | -0.413 | 0.001138 |
| <i>TMCO3</i>     | -0.412 | 0.001175 |
| <i>ABHD12</i>    | -0.412 | 0.001117 |
| <i>IL25</i>      | -0.408 | 0.001358 |
| <i>TMEM106B</i>  | -0.408 | 0.001344 |
| <i>CBR1</i>      | -0.408 | 0.001322 |
| <i>FAM114A1</i>  | -0.407 | 0.001393 |
| <i>HDLBP</i>     | -0.407 | 0.00139  |
| <i>ATP1B1</i>    | -0.406 | 0.001435 |
| <i>NOTCH2</i>    | -0.405 | 0.001459 |
| <i>LOC346329</i> | -0.404 | 0.001515 |
| <i>SGCE</i>      | -0.404 | 0.001488 |
| <i>ACTN4P1</i>   | -0.401 | 0.00163  |
| <i>TXNRD1</i>    | -0.401 | 0.001624 |
| <i>GNG11</i>     | -0.4   | 0.00172  |
| <i>MYH9</i>      | -0.399 | 0.001747 |
| <i>GPC1</i>      | -0.399 | 0.001734 |
| <i>CDRT1</i>     | -0.398 | 0.001785 |
| <i>PLVAP</i>     | -0.397 | 0.002058 |
| <i>CREB5</i>     | -0.397 | 0.001875 |
| <i>PLS3</i>      | -0.396 | 0.001925 |
| <i>MEIS3P2</i>   | -0.396 | 0.001911 |
| <i>DCLK1</i>     | -0.396 | 0.001886 |
| <i>CKAP4</i>     | -0.396 | 0.001882 |
| <i>SH2D4A</i>    | -0.394 | 0.002011 |
| <i>P4HB</i>      | -0.394 | 0.002009 |
| <i>MIR132</i>    | -0.39  | 0.002495 |
| <i>SH3RF2</i>    | -0.39  | 0.002285 |
| <i>C2CD4A</i>    | -0.389 | 0.002527 |
| <i>SMIM14</i>    | -0.389 | 0.002298 |
| <i>DSEL</i>      | -0.388 | 0.002379 |
| <i>TMC3</i>      | -0.387 | 0.002709 |
| <i>SLC9A3P3</i>  | -0.387 | 0.002675 |
| <i>FTH1P1</i>    | -0.387 | 0.002674 |
| <i>LAMB1</i>     | -0.387 | 0.002494 |
| <i>TMED9</i>     | -0.387 | 0.002482 |
| <i>PKM</i>       | -0.386 | 0.002546 |
| <i>APP</i>       | -0.386 | 0.002535 |
| <i>LOC284865</i> | -0.384 | 0.002961 |
| <i>EGLN1</i>     | -0.384 | 0.002696 |

|                  |        |          |
|------------------|--------|----------|
| <i>PRDX1</i>     | -0.384 | 0.002678 |
| <i>LOC388882</i> | -0.383 | 0.003041 |
| <i>CEACAM8</i>   | -0.382 | 0.003099 |
| <i>CLIP4</i>     | -0.382 | 0.002819 |
| <i>DYNC1LI2</i>  | -0.382 | 0.002794 |
| <i>SPOCK1</i>    | -0.381 | 0.00288  |
| <i>SRXN1</i>     | -0.38  | 0.003003 |
| <i>ENC1</i>      | -0.38  | 0.002962 |
| <i>BMPRI1B</i>   | -0.378 | 0.003201 |
| <i>ATXN1</i>     | -0.378 | 0.003182 |
| <i>SLC7A11</i>   | -0.377 | 0.00329  |
| <i>NUAK2</i>     | -0.377 | 0.00329  |
| <i>SSPN</i>      | -0.377 | 0.003275 |
| <i>FNDC3B</i>    | -0.377 | 0.003266 |
| <i>TRIO</i>      | -0.377 | 0.003226 |
| <i>ABCC3</i>     | -0.377 | 0.003223 |
| <i>FAM19A1</i>   | -0.376 | 0.003606 |
| <i>SLCO3A1</i>   | -0.376 | 0.003361 |
| <i>LMNA</i>      | -0.376 | 0.003361 |
| <i>COTL1</i>     | -0.375 | 0.003468 |
| <i>CLPTM1</i>    | -0.375 | 0.003403 |
| <i>SPAG1</i>     | -0.375 | 0.00339  |
| <i>LDOC1</i>     | -0.374 | 0.003546 |
| <i>CHST3</i>     | -0.373 | 0.003662 |
| <i>CCDC144CP</i> | -0.373 | 0.003655 |
| <i>SH3BP4</i>    | -0.373 | 0.003655 |
| <i>FBXL5</i>     | -0.373 | 0.003647 |
| <i>MYO10</i>     | -0.373 | 0.003633 |
| <i>SLPI</i>      | -0.373 | 0.003616 |
| <i>IGFBP3</i>    | -0.372 | 0.003716 |
| <i>GCLM</i>      | -0.372 | 0.003709 |
| <i>ROR1</i>      | -0.371 | 0.00378  |
| <i>LINC01119</i> | -0.37  | 0.004269 |
| <i>NTN4</i>      | -0.37  | 0.003901 |
| <i>ASPH</i>      | -0.369 | 0.004059 |
| <i>PGM1</i>      | -0.369 | 0.004047 |
| <i>DSG2</i>      | -0.369 | 0.004016 |
| <i>ACTBP11</i>   | -0.368 | 0.004446 |
| <i>GNG12</i>     | -0.368 | 0.004094 |
| <i>COL4A2</i>    | -0.367 | 0.004201 |
| <i>RPL7AP69</i>  | -0.366 | 0.004778 |
| <i>CYP51P1</i>   | -0.366 | 0.004765 |
| <i>OR51L1</i>    | -0.366 | 0.004693 |
| <i>ANXA5</i>     | -0.366 | 0.004384 |
| <i>PLXNB2</i>    | -0.366 | 0.004307 |

|                     |        |          |
|---------------------|--------|----------|
| <i>PLCE1</i>        | -0.365 | 0.004441 |
| <i>LINC00304</i>    | -0.364 | 0.005013 |
| <i>SQSTM1</i>       | -0.364 | 0.004652 |
| <i>PANX2</i>        | -0.364 | 0.004611 |
| <i>ATP1B1P1</i>     | -0.364 | 0.004598 |
| <i>CD55</i>         | -0.364 | 0.004569 |
| <i>ADAM9</i>        | -0.363 | 0.004719 |
| <i>CYP51P2</i>      | -0.362 | 0.005262 |
| <i>ALDOAP2</i>      | -0.362 | 0.005223 |
| <i>PRSS12</i>       | -0.362 | 0.004901 |
| <i>ZNF112</i>       | -0.362 | 0.004837 |
| <i>PVR</i>          | -0.361 | 0.004989 |
| <i>LOC644936</i>    | -0.361 | 0.004923 |
| <i>RABAC1</i>       | -0.36  | 0.005119 |
| <i>CAVI</i>         | -0.36  | 0.005099 |
| <i>PRDM5</i>        | -0.36  | 0.00505  |
| <i>GNA11</i>        | -0.36  | 0.005036 |
| <i>GRIP1</i>        | -0.359 | 0.005228 |
| <i>EDIL3</i>        | -0.359 | 0.005224 |
| <i>PDLIM1</i>       | -0.359 | 0.005212 |
| <i>BCL3</i>         | -0.359 | 0.005192 |
| <i>KRT82</i>        | -0.358 | 0.005752 |
| <i>LOC344887</i>    | -0.358 | 0.005411 |
| <i>LOC100131831</i> | -0.358 | 0.005357 |
| <i>EPB41L1</i>      | -0.358 | 0.00533  |
| <i>PDIA6</i>        | -0.358 | 0.005322 |
| <i>CD70</i>         | -0.358 | 0.00532  |
| <i>PYY</i>          | -0.357 | 0.006016 |
| <i>UGDH</i>         | -0.357 | 0.005499 |
| <i>TPCN1</i>        | -0.357 | 0.005496 |
| <i>TMED3</i>        | -0.357 | 0.005457 |
| <i>AHR</i>          | -0.356 | 0.005641 |
| <i>RNF11</i>        | -0.356 | 0.005614 |
| <i>TRAJ61</i>       | -0.355 | 0.006292 |
| <i>PPP3CA</i>       | -0.355 | 0.005848 |
| <i>P4HA2</i>        | -0.355 | 0.005783 |
| <i>SPHAR</i>        | -0.355 | 0.005769 |
| <i>COL4A1</i>       | -0.354 | 0.005967 |
| <i>PEG10</i>        | -0.354 | 0.005935 |
| <i>ATP10D</i>       | -0.354 | 0.005924 |
| <i>LGR4</i>         | -0.354 | 0.005899 |
| <i>PLAUR</i>        | -0.354 | 0.005895 |
| <i>KDELR2</i>       | -0.353 | 0.006166 |
| <i>C9orf3</i>       | -0.353 | 0.006158 |
| <i>TNFRSF1A</i>     | -0.353 | 0.006035 |



|                     |        |          |
|---------------------|--------|----------|
| <i>UACA</i>         | -0.352 | 0.006273 |
| <i>OSGIN1</i>       | -0.352 | 0.006261 |
| <i>CYP51A1</i>      | -0.352 | 0.006256 |
| <i>PDE7B</i>        | -0.352 | 0.006248 |
| <i>FTH1P11</i>      | -0.352 | 0.006235 |
| <i>SOCS6</i>        | -0.351 | 0.006483 |
| <i>NRP1</i>         | -0.351 | 0.006431 |
| <i>RNF135</i>       | -0.351 | 0.006399 |
| <i>GCNT1</i>        | -0.351 | 0.006377 |
| <i>PRR5L</i>        | -0.351 | 0.006358 |
| <i>COL4A5</i>       | -0.35  | 0.006615 |
| <i>ALDH3A2</i>      | -0.35  | 0.006603 |
| <i>CAV3</i>         | -0.35  | 0.006548 |
| <i>TRBV6-5</i>      | -0.349 | 0.0072   |
| <i>ECE1</i>         | -0.349 | 0.006759 |
| <i>ANXA8L1</i>      | -0.349 | 0.006684 |
| <i>KCTD1</i>        | -0.348 | 0.006922 |
| <i>TSPAN3</i>       | -0.348 | 0.006863 |
| <i>KRT17P2</i>      | -0.347 | 0.007622 |
| <i>PLA2R1</i>       | -0.347 | 0.007594 |
| <i>LINC00842</i>    | -0.347 | 0.007591 |
| <i>CAST</i>         | -0.347 | 0.007169 |
| <i>NEK6</i>         | -0.347 | 0.007156 |
| <i>FUCA2</i>        | -0.347 | 0.007153 |
| <i>S100A11P2</i>    | -0.346 | 0.007322 |
| <i>PPIC</i>         | -0.346 | 0.007281 |
| <i>RNF11P2</i>      | -0.346 | 0.007274 |
| <i>DCLK2</i>        | -0.346 | 0.007196 |
| <i>SLC2A8</i>       | -0.345 | 0.007446 |
| <i>PALLD</i>        | -0.344 | 0.007728 |
| <i>SYNC</i>         | -0.344 | 0.007674 |
| <i>JAG1</i>         | -0.344 | 0.007664 |
| <i>TGFB2</i>        | -0.344 | 0.007653 |
| <i>CIS</i>          | -0.344 | 0.007554 |
| <i>NFIB</i>         | -0.343 | 0.00792  |
| <i>AHCYL1</i>       | -0.343 | 0.007851 |
| <i>LOC100129781</i> | -0.342 | 0.008577 |
| <i>SCARA3</i>       | -0.342 | 0.008114 |
| <i>PDLIM5</i>       | -0.342 | 0.008064 |
| <i>FUCA1</i>        | -0.342 | 0.008062 |
| <i>ZNF229</i>       | -0.342 | 0.008024 |
| <i>TUSC1</i>        | -0.342 | 0.008008 |
| <i>BBX</i>          | -0.342 | 0.008006 |
| <i>BHLHE41</i>      | -0.341 | 0.008282 |
| <i>RNF145</i>       | -0.341 | 0.008213 |

|                     |        |          |
|---------------------|--------|----------|
| <i>FAM71E2</i>      | -0.34  | 0.009111 |
| <i>GALNS</i>        | -0.34  | 0.008479 |
| <i>EYA4</i>         | -0.34  | 0.008342 |
| <i>GEM</i>          | -0.34  | 0.00834  |
| <i>AKAP13</i>       | -0.339 | 0.008725 |
| <i>LAMC1</i>        | -0.339 | 0.008703 |
| <i>RAB10</i>        | -0.339 | 0.008614 |
| <i>CAPN2</i>        | -0.339 | 0.00857  |
| <i>DAG1</i>         | -0.339 | 0.008554 |
| <i>MIR485</i>       | -0.338 | 0.009569 |
| <i>RN7SLAP</i>      | -0.338 | 0.009453 |
| <i>LOC100506737</i> | -0.338 | 0.009441 |
| <i>IGFBP7</i>       | -0.338 | 0.008852 |
| <i>CLTC</i>         | -0.338 | 0.008735 |
| <i>HLF</i>          | -0.337 | 0.009081 |
| <i>ADRA1B</i>       | -0.337 | 0.009032 |
| <i>SOCS5</i>        | -0.337 | 0.008999 |
| <i>HMOX1</i>        | -0.336 | 0.009386 |
| <i>CD44</i>         | -0.336 | 0.009198 |
| <i>DNAJC10</i>      | -0.335 | 0.009547 |
| <i>VAMP3</i>        | -0.335 | 0.009434 |
| <i>TTC28</i>        | -0.335 | 0.009427 |
| <i>MIR31HG</i>      | -0.335 | 0.009426 |
| <i>RASAL2</i>       | -0.334 | 0.00978  |
| <i>AGRN</i>         | -0.334 | 0.009735 |
| <i>CCND1</i>        | -0.334 | 0.009662 |

\* Pearson's correlations between ascorbic acid (33832) drug activity (Z scores) and gene transcript levels (Z scores) in NCI-60 cancer cells were generated using the NCI-60 CellMiner web tool (<http://discover.nci.nih.gov/cellminer/>, Database Version 2.1). 246 genes with significant negative Pearson's correlations between their gene transcript levels and AA cytotoxicity were identified and are represented in this table. Significant negative correlation is identified at  $r < -0.334$  respectively based on a minimum of 35 informative cell lines and yielding  $P < 0.05$ .

§ Two-sided  $P$  values were not adjusted for multiple comparisons and were generated from NCI-60 CellMiner web tool.
